# Supplementary material
Source: ML conference proceedings conference paper supplement (https://openreview.net/forum?id=m7C04OET3V)
Supplement: supplementary_material [file attachment]

## A DATASET DETAIL

In this study, we use 25 public datasets mostly from the OpenML (Vanschoren et al., 2014) library, including the frequently used datasets in previous studies (Yoon et al., 2020; Ucar et al., 2021; Gorishniy et al., 2021; 2022). Each dataset has exactly one train-validation-test split, so all algorithms use the same splits as the previous studies (Gorishniy et al., 2021; 2022; Rubachev et al., 2022). We summarize the main properties of datasets in Table 5. For each dataset, we use a predefined batch size depending on the number of training samples: 64 when the number of training samples is less than 1000, 128 when the number of training samples is larger than 1000 and less than 5000, 256 when the number of training samples is larger than 5000 and less than 10000, 512 when the number of training samples is larger than 10000 and less than 50000, and 1024 when the number of training samples is larger than 50000.

We regard the feature as categorical when the number of unique values in the training dataset is less than 20 (5 for AL, MNIST, p-MNIST, MI). The categorical variables are fed into the feature tokenizer for FT-Transformer while MLP has no additional operation for them. For MNIST and p-MNIST datasets, we ignore the features that have only one possible value throughout the training dataset.

Table 5: Dataset summary.

| Abbr.   | Name                                                 | # Train | # Validation | # Test | # Num | # Cat | Task type  | Batch size |
|---------|------------------------------------------------------|---------|--------------|--------|-------|-------|------------|------------|
| CH      | Churn Modeling <sup>1</sup>                          | 6400    | 1600         | 2000   | 4     | 6     | Binclass   | 256        |
| HI      | Higgs Small (Baldi et al., 2014)                     | 62751   | 15688        | 19610  | 24    | 4     | Binclass   | 1024       |
| AD      | Adult (Kohavi et al., 1996)                          | 26048   | 6513         | 16281  | 2     | 12    | Binclass   | 512        |
| BM      | Bank Marketing (Moro et al., 2011)                   | 28934   | 7234         | 9043   | 7     | 9     | Binclass   | 512        |
| PH      | Philippine (Guyon et al., 2019)                      | 3732    | 933          | 1167   | 308   | 0     | Binclass   | 128        |
| OS      | Online Shoppers (Sakar et al., 2019)                 | 7891    | 1973         | 2466   | 8     | 9     | Binclass   | 256        |
| CS      | German Credit dataset <sup>2</sup>                   | 640     | 160          | 200    | 20    | 0     | Binclass   | 64         |
| PO      | Phoneme                                              | 3458    | 865          | 1081   | 5     | 0     | Binclass   | 128        |
| CO      | Covertypes (Blackard & Dean, 1999)                   | 371847  | 92962        | 116203 | 44    | 7     | Multiclass | 1024       |
| OT      | Otto Group Products <sup>3</sup>                     | 39601   | 9901         | 12376  | 80    | 13    | Multiclass | 512        |
| GE      | Gesture Phase                                        | 6318    | 1580         | 1975   | 32    | 0     | Multiclass | 256        |
| VO      | Volkert <sup>4</sup> Guyon et al. (2019)             | 37318   | 9330         | 11662  | 147   | 33    | Multiclass | 512        |
| WQ      | Wine Quality (Cortez et al., 2009)                   | 4157    | 1040         | 1300   | 11    | 0     | Multiclass | 128        |
| AL      | ALOI (Geusebroek et al., 2005)                       | 69120   | 17280        | 21600  | 124   | 4     | Multiclass | 1024       |
| HE      | Helena (Guyon et al., 2019)                          | 62752   | 15688        | 19610  | 27    | 0     | Multiclass | 512        |
| MNIST   | Handwritten Digit Images                             | 50000   | 10000        | 10000  | 627   | 90    | Multiclass | 512        |
| p-MNIST | Permuted MNIST                                       | 50000   | 10000        | 10000  | 627   | 90    | Multiclass | 512        |
| CA      | California Housing (Pace & Barry, 1997)              | 13209   | 3303         | 4128   | 8     | 0     | Regression | 512        |
| HO      | House 16H <sup>5</sup>                               | 14581   | 3646         | 4557   | 16    | 0     | Regression | 512        |
| FI      | FIFA                                                 | 12273   | 3069         | 3836   | 28    | 0     | Regression | 512        |
| MI      | MSLR-WEB10K(Fold 1) (Qin & Liu, 2013)                | 723412  | 235259       | 241521 | 131   | 5     | Regression | 1024       |
| KI      | Forward kinetics of an 8 link robot arm <sup>6</sup> | 5242    | 1311         | 1639   | 8     | 0     | Regression | 256        |
| CPU     | Computer Activity Databases <sup>7</sup>             | 5242    | 1311         | 1639   | 8     | 0     | Regression | 256        |
| DIA     | Diamonds                                             | 34521   | 8631         | 10788  | 9     | 0     | Regression | 512        |
| EL      | Electricity <sup>8</sup>                             | 24623   | 6156         | 7695   | 7     | 0     | Regression | 512        |

## B IMPLEMENTATION DETAILS

We use the optimization strategy for SSL as follows. We do not tune any hyperparameter and the same configuration is applied to all cases.

- Optimizer: AdamW (Loshchilov & Hutter, 2017)
- Learning rate: 1e-4

<sup>1</sup><https://www.kaggle.com/datasets/shrutimechlearn/churn-modelling>

<sup>2</sup><https://archive.ics.uci.edu/dataset/144/statlog+german+credit+data>

<sup>3</sup><https://www.kaggle.com/c/otto-group-product-classification-challenge/data>

<sup>4</sup><https://automl.chalearn.org/data>

<sup>5</sup><http://www.ncc.up.pt/~ltorgo/Regression/DataSets.html>

<sup>6</sup><http://www.ncc.up.pt/~ltorgo/Regression/DataSets.html>

<sup>7</sup><http://www.ncc.up.pt/~ltorgo/Regression/DataSets.html>

<sup>8</sup><https://github.com/LeoGrin/tabular-benchmark>

- Weight decay:  $1e-5$
- Epochs: 1000
- Learning rate scheduler: Cosine annealing scheduler (Loshchilov & Hutter, 2016; Goyal et al., 2017)

For the hyperparameters related to SSL, we tried  $p_m \in \{0.1, 0.2, 0.3, 0.4, 0.5, 0.6, 0.7, 0.8, 0.9\}$  and  $T \in \{2, 5, 10, 20, 50, 100\}$ . When we combine the transformation function and binning methods, to reduce the hyperparameter space, we tried  $p_m \in \{0.1, 0.2, 0.3\}$  and  $T \in \{2, 10\}$  for MLPs, and  $p_m \in \{0.1, 0.2\}$  and  $T \in \{2, 10\}$  for FT-Transformers. After SSL, we evaluate the pre-trained representations with the linear head. The linear head is trained with different random seeds 10 times, and the average performance is reported.

For other state-of-the-art models, we directly reference the reported performance in the papers to reduce the ambiguity from the random seeds or the tuning details.

### B.1 MLP

For MLPs, we set the architecture when the validation performance is best under the supervised setup with the encoder network  $f_e$  after the grid search on the depth (1, 2, 3, 4, 5) and the width (128, 256, 512, 1024). The representation size is determined as identical to the width of MLPs. The following decoder network  $f_d$  is defined as symmetric with  $f_e$ .

For supervised learning, we use the same configuration of SSL summarized above, except that the learning rate is 0.001 and the number of epochs is 100. We summarize the best setups for all datasets as follows.

Table 6: MLP architectures.

| Depth | Datasets                            | Width | Datasets                          |
|-------|-------------------------------------|-------|-----------------------------------|
| 1     | CH, HI, AD, BM, OS, FI, CS          | 128   | CH, HI, AD, BM, OS, FI, MI, CA    |
| 2     | MI, CPU, HE, OT, AL                 | 256   | CS, HE, KI, PH, HO                |
| 3     | CA, KI, MNIST, EL                   | 512   | CPU, WQ, p-MNIST, DIA             |
| 4     | WQ, p-MNIST, PH, HO, CO, GE, VO, PO | 1024  | CO, GE, VO, PO, MNIST, EL, OT, AL |
| 5     | DIA                                 |       |                                   |

### B.2 FT-TRANSFORMER

We do not conduct any hyperparameter tuning for FT-Transformer, and we use the default setup defined in Gorishniy et al. (2021) with the number of blocks as 3. For three large-scale datasets, such as MI, MNIST, and p-MNIST, we set the number of blocks as 1 because of the computational budget. For the representation size, we adopt the value found in MLP cases. For  $f_d$ , we use the MLP network whose architecture is the same as Table 6.

### B.3 LINEAR EVALUATION AND FINE-TUNING

For linear evaluation, we use the same optimization configuration for SSL except for the learning rate of 0.01 for 100 epochs. For fine-tuning, we use the same setups of the supervised cases.

## C FULL RESULTS

Here, we present the comprehensive results from our manuscript, accompanied by standard deviations derived from 10 repetitions of the experiment.

Table 7: Full results of Table 1. We repeat the evaluation 10 times and the average and the standard deviations are provided.

(a) Binary classification

| Masking | Masking value | Objective(s)        | CH                  | HI                  | AD                  | BM                  | PH                  | OS                  | CS                  | PO                  |
|---------|---------------|---------------------|---------------------|---------------------|---------------------|---------------------|---------------------|---------------------|---------------------|---------------------|
| FALSE   | -             | ValueRecon          | 0.810±0.001         | 0.651±0.000         | 0.837±0.000         | 0.899±0.000         | 0.728±0.001         | 0.883±0.000         | 0.709±0.003         | 0.851±0.000         |
| TRUE    | Const.        | MaskXent            | 0.807±0.001         | 0.672±0.000         | 0.836±0.000         | 0.899±0.000         | 0.715±0.000         | 0.893±0.000         | 0.708±0.004         | 0.845±0.000         |
| TRUE    | Const.        | ValueRecon          | 0.810±0.000         | 0.653±0.000         | 0.839±0.000         | 0.900±0.000         | 0.734±0.001         | 0.884±0.000         | 0.718±0.002         | 0.849±0.001         |
| TRUE    | Const.        | MaskXent+ValueRecon | 0.817±0.001         | 0.669±0.000         | 0.835±0.000         | 0.900±0.000         | 0.724±0.001         | 0.877±0.000         | 0.706±0.000         | 0.837±0.002         |
| TRUE    | Random        | MaskXent            | 0.814±0.000         | 0.681±0.000         | 0.843±0.000         | <b>0.901</b> ±0.000 | 0.710±0.000         | 0.883±0.000         | 0.706±0.000         | 0.853±0.000         |
| TRUE    | Random        | ValueRecon          | 0.811±0.000         | 0.661±0.000         | 0.838±0.000         | 0.898±0.000         | <b>0.738</b> ±0.001 | 0.885±0.000         | 0.714±0.003         | 0.842±0.000         |
| TRUE    | Random        | MaskXent+ValueRecon | 0.804±0.001         | 0.647±0.000         | 0.826±0.000         | 0.899±0.000         | 0.715±0.003         | 0.879±0.001         | 0.713±0.003         | 0.861±0.001         |
| FALSE   | -             | BinXent             | 0.817±0.001         | 0.683±0.000         | 0.845±0.000         | <b>0.901</b> ±0.000 | 0.732±0.001         | 0.886±0.000         | <b>0.738</b> ±0.000 | 0.851±0.001         |
| FALSE   | -             | BinRecon            | <b>0.823</b> ±0.000 | <b>0.687</b> ±0.000 | 0.840±0.000         | 0.900±0.000         | 0.737±0.000         | 0.889±0.000         | 0.724±0.005         | <b>0.865</b> ±0.000 |
| TRUE    | Const.        | BinRecon            | 0.820±0.000         | 0.672±0.000         | 0.843±0.000         | 0.899±0.000         | 0.730±0.000         | <b>0.896</b> ±0.000 | 0.718±0.004         | 0.858±0.000         |
| TRUE    | Random        | BinRecon            | 0.819±0.001         | 0.682±0.000         | <b>0.846</b> ±0.000 | 0.898±0.000         | 0.735±0.000         | 0.894±0.000         | 0.718±0.004         | 0.858±0.000         |

(b) Multiclass classification

| Masking | Masking value | Objective(s)        | CO                  | OT                  | GE                  | VO                  | WQ                  | AL                  | HE                  | MINIST              | p-MNIST             |
|---------|---------------|---------------------|---------------------|---------------------|---------------------|---------------------|---------------------|---------------------|---------------------|---------------------|---------------------|
| FALSE   | -             | ValueRecon          | 0.769±0.000         | 0.776±0.000         | 0.527±0.001         | 0.619±0.000         | 0.568±0.001         | 0.931±0.000         | 0.353±0.000         | 0.965±0.000         | 0.928±0.000         |
| TRUE    | Const.        | MaskXent            | 0.784±0.000         | 0.777±0.000         | 0.518±0.001         | 0.645±0.000         | 0.547±0.000         | 0.909±0.001         | 0.341±0.000         | 0.793±0.000         | 0.554±0.000         |
| TRUE    | Const.        | ValueRecon          | 0.783±0.000         | 0.791±0.000         | 0.557±0.001         | 0.622±0.000         | 0.586±0.001         | 0.931±0.000         | 0.354±0.000         | 0.966±0.000         | 0.925±0.000         |
| TRUE    | Const.        | MaskXent+ValueRecon | 0.750±0.000         | 0.774±0.001         | 0.519±0.005         | 0.610±0.000         | 0.571±0.001         | 0.931±0.000         | 0.360±0.000         | 0.941±0.000         | 0.907±0.000         |
| TRUE    | Random        | MaskXent            | 0.763±0.000         | 0.791±0.000         | 0.555±0.000         | 0.549±0.000         | 0.544±0.001         | 0.925±0.000         | 0.336±0.000         | 0.945±0.000         | 0.817±0.000         |
| TRUE    | Random        | ValueRecon          | 0.761±0.000         | 0.782±0.000         | 0.538±0.001         | 0.625±0.000         | 0.573±0.000         | 0.930±0.000         | 0.357±0.000         | 0.956±0.000         | 0.934±0.000         |
| TRUE    | Random        | MaskXent+ValueRecon | 0.769±0.000         | 0.779±0.001         | 0.521±0.004         | 0.564±0.001         | 0.519±0.004         | 0.925±0.001         | 0.353±0.001         | 0.945±0.000         | 0.906±0.001         |
| FALSE   | -             | BinXent             | 0.742±0.000         | 0.781±0.000         | 0.517±0.001         | 0.600±0.001         | 0.565±0.001         | 0.903±0.001         | 0.354±0.000         | 0.956±0.000         | 0.908±0.000         |
| FALSE   | -             | BinRecon            | 0.784±0.000         | 0.783±0.000         | 0.544±0.001         | 0.625±0.000         | <b>0.592</b> ±0.001 | 0.935±0.000         | 0.357±0.000         | 0.964±0.000         | 0.950±0.000         |
| TRUE    | Const.        | BinRecon            | 0.812±0.000         | 0.792±0.000         | 0.559±0.001         | 0.647±0.000         | 0.581±0.001         | 0.943±0.000         | 0.359±0.000         | 0.974±0.000         | 0.964±0.000         |
| TRUE    | Random        | BinRecon            | <b>0.814</b> ±0.000 | <b>0.794</b> ±0.000 | <b>0.580</b> ±0.000 | <b>0.655</b> ±0.000 | 0.574±0.001         | <b>0.949</b> ±0.000 | <b>0.365</b> ±0.000 | <b>0.981</b> ±0.000 | <b>0.971</b> ±0.000 |

(c) Regression

| Masking | Masking value | Objective(s)        | CA                  | HO                  | FI                      | MI                  | KI                  | CPU                 | DIA                   | EL                  |
|---------|---------------|---------------------|---------------------|---------------------|-------------------------|---------------------|---------------------|---------------------|-----------------------|---------------------|
| FALSE   | -             | ValueRecon          | 0.749±0.000         | 4.241±0.001         | 1390.720±0.816          | 0.784±0.000         | 0.163±0.000         | 3.876±0.002         | 1016.641±0.191        | 0.399±0.001         |
| TRUE    | Const.        | MaskXent            | 0.709±0.000         | 4.548±0.000         | 13473.750±1.371         | 0.788±0.000         | 0.185±0.000         | 4.475±0.033         | 1259.744±1.066        | 0.396±0.000         |
| TRUE    | Const.        | ValueRecon          | 0.693±0.000         | 4.086±0.000         | 13518.683±0.936         | 0.778±0.000         | 0.160±0.000         | 3.728±0.003         | 952.444±0.130         | 0.394±0.000         |
| TRUE    | Const.        | MaskXent+ValueRecon | 0.700±0.001         | 4.157±0.045         | 13915.875±18.078        | 0.775±0.000         | 0.174±0.001         | 5.644±0.078         | 2797.034±191.324      | 0.398±0.001         |
| TRUE    | Random        | MaskXent            | 0.677±0.000         | 4.297±0.000         | 13826.641±0.624         | 0.782±0.000         | 0.176±0.000         | 3.951±0.001         | 1358.135±0.191        | 0.388±0.000         |
| TRUE    | Random        | ValueRecon          | 0.713±0.000         | 4.127±0.000         | 13668.988±1.262         | 0.777±0.000         | 0.162±0.000         | 3.760±0.002         | 986.306±0.359         | 0.396±0.000         |
| TRUE    | Random        | MaskXent+ValueRecon | 0.701±0.003         | 4.136±0.028         | 14107.645±29.125        | 0.780±0.001         | 0.166±0.001         | 4.506±0.034         | 1917.875±123.359      | 0.397±0.008         |
| FALSE   | -             | BinXent             | 0.690±0.000         | 4.116±0.001         | <b>13038.762</b> ±1.618 | 0.776±0.000         | 0.170±0.000         | 3.717±0.006         | 1207.923±2.552        | 0.383±0.000         |
| FALSE   | -             | BinRecon            | 0.622±0.000         | 3.766±0.000         | 13453.309±0.832         | <b>0.767</b> ±0.000 | <b>0.158</b> ±0.000 | <b>3.208</b> ±0.001 | 897.645±0.182         | 0.370±0.000         |
| TRUE    | Const.        | BinRecon            | 0.634±0.000         | 3.765±0.000         | 13208.133±1.960         | 0.773±0.000         | <b>0.158</b> ±0.000 | <b>3.156</b> ±0.002 | 957.801±0.070         | 0.371±0.000         |
| TRUE    | Random        | BinRecon            | <b>0.619</b> ±0.000 | <b>3.703</b> ±0.000 | 13075.474±0.800         | 0.773±0.000         | 0.160±0.000         | 3.183±0.001         | <b>870.283</b> ±0.093 | <b>0.368</b> ±0.000 |

Table 8: Full results of Table 2. We repeat the evaluation 10 times and the average and the standard deviations are provided.

(a) Binary classification

| Method          | CH          | HI          | AD          | BM          | PH          | OS          | CS          | PO          |
|-----------------|-------------|-------------|-------------|-------------|-------------|-------------|-------------|-------------|
| MLP(Init.)      | 0.796±0.003 | 0.622±0.004 | 0.820±0.002 | 0.892±0.001 | 0.683±0.011 | 0.873±0.002 | 0.726±0.016 | 0.771±0.007 |
| MLP(Supervised) | 0.836±0.003 | 0.713±0.002 | 0.849±0.001 | 0.902±0.001 | 0.724±0.009 | 0.895±0.002 | 0.666±0.026 | 0.894±0.005 |
| MLP(Ours)       | 0.823±0.000 | 0.687±0.000 | 0.846±0.000 | 0.901±0.000 | 0.736±0.001 | 0.896±0.000 | 0.738±0.000 | 0.865±0.000 |
| MLP(Ours+FT)    | 0.841±0.002 | 0.716±0.001 | 0.854±0.001 | 0.905±0.001 | 0.738±0.009 | 0.895±0.002 | 0.686±0.006 | 0.892±0.004 |
| FTT(Init.)      | 0.818±0.004 | 0.636±0.007 | 0.828±0.004 | 0.890±0.002 | 0.694±0.008 | 0.866±0.003 | 0.698±0.022 | 0.851±0.006 |
| FTT(Supervised) | 0.824±0.005 | 0.701±0.003 | 0.837±0.003 | 0.903±0.002 | 0.724±0.018 | 0.884±0.002 | 0.676±0.028 | 0.895±0.006 |
| FTT(Ours)       | 0.836±0.000 | 0.670±0.000 | 0.853±0.000 | 0.899±0.000 | 0.725±0.000 | 0.887±0.000 | 0.725±0.000 | 0.867±0.001 |
| FTT(Ours+FT)    | 0.835±0.004 | 0.700±0.002 | 0.839±0.002 | 0.903±0.003 | 0.734±0.004 | 0.882±0.004 | 0.688±0.022 | 0.898±0.007 |

(b) Multiclass classification

| Method          | CO          | OT          | GE          | VO          | WQ          | AL          | HE          | MNIST       | p-MNIST     |
|-----------------|-------------|-------------|-------------|-------------|-------------|-------------|-------------|-------------|-------------|
| MLP(Init.)      | 0.729±0.003 | 0.766±0.001 | 0.467±0.007 | 0.547±0.004 | 0.540±0.011 | 0.897±0.002 | 0.311±0.002 | 0.896±0.002 | 0.731±0.010 |
| MLP(Supervised) | 0.968±0.000 | 0.810±0.002 | 0.659±0.007 | 0.694±0.002 | 0.623±0.006 | 0.960±0.001 | 0.378±0.002 | 0.983±0.001 | 0.978±0.001 |
| MLP(Ours)       | 0.814±0.000 | 0.794±0.000 | 0.580±0.000 | 0.655±0.000 | 0.592±0.001 | 0.949±0.000 | 0.365±0.000 | 0.981±0.000 | 0.971±0.000 |
| MLP(Ours+FT)    | 0.969±0.000 | 0.814±0.002 | 0.675±0.009 | 0.724±0.002 | 0.630±0.006 | 0.963±0.001 | 0.385±0.002 | 0.986±0.000 | 0.982±0.001 |
| FTT(Init.)      | 0.730±0.002 | 0.705±0.008 | 0.509±0.007 | 0.544±0.005 | 0.569±0.007 | 0.762±0.009 | 0.311±0.004 | 0.550±0.025 | 0.480±0.022 |
| FTT(Supervised) | 0.970±0.000 | 0.794±0.004 | 0.664±0.008 | 0.704±0.005 | 0.617±0.008 | 0.960±0.001 | 0.338±0.003 | 0.966±0.002 | 0.960±0.002 |
| FTT(Ours)       | 0.762±0.000 | 0.780±0.000 | 0.554±0.000 | 0.614±0.000 | 0.562±0.001 | 0.930±0.001 | 0.364±0.000 | 0.931±0.000 | 0.883±0.000 |
| FTT(Ours+FT)    | 0.971±0.000 | 0.793±0.002 | 0.698±0.006 | 0.720±0.003 | 0.623±0.006 | 0.961±0.001 | 0.342±0.001 | 0.978±0.001 | 0.966±0.001 |

(c) Regression

| Method          | CA          | HO          | FI                | MI          | KI          | CPU         | DIA             | EL          |
|-----------------|-------------|-------------|-------------------|-------------|-------------|-------------|-----------------|-------------|
| MLP(Init.)      | 0.854±0.039 | 4.700±0.055 | 14241.610±241.419 | 0.781±0.002 | 0.192±0.003 | 5.564±0.205 | 1291.373±46.713 | 0.400±0.001 |
| MLP(Supervised) | 0.513±0.002 | 3.146±0.036 | 10086.080± 65.915 | 0.754±0.000 | 0.071±0.001 | 2.793±0.013 | 562.153± 2.598  | 0.354±0.001 |
| MLP(Ours)       | 0.619±0.000 | 3.703±0.000 | 13038.762± 1.618  | 0.767±0.000 | 0.158±0.000 | 3.156±0.002 | 870.283± 0.093  | 0.368±0.000 |
| MLP(Ours+FT)    | 0.502±0.002 | 3.026±0.037 | 9963.609± 23.173  | 0.753±0.000 | 0.071±0.001 | 2.801±0.016 | 550.717± 3.171  | 0.350±0.001 |
| FTT(Init.)      | 0.690±0.021 | 4.107±0.039 | 16128.694±383.004 | 0.791±0.004 | 0.181±0.004 | 5.205±0.324 | 1021.200±30.271 | 0.394±0.002 |
| FTT(Supervised) | 0.487±0.007 | 3.319±0.067 | 10206.127±347.223 | 0.752±0.000 | 0.072±0.001 | 2.780±0.049 | 540.904± 3.627  | 0.350±0.001 |
| FTT(Ours)       | 0.549±0.000 | 3.570±0.000 | 14557.626± 1.390  | 0.770±0.000 | 0.153±0.000 | 3.645±0.000 | 865.654± 0.005  | 0.371±0.000 |
| FTT(Ours+FT)    | 0.477±0.002 | 3.173±0.024 | 9936.115±226.549  | 0.752±0.001 | 0.072±0.001 | 2.792±0.038 | 542.962± 3.207  | 0.343±0.001 |

## D ADDITIONAL RESULTS FOR DISCUSSION

### D.1 COMPARING THE BINNING METHOD BETWEEN THE QUANTILES AND THE EQUAL-WIDTH

We found that the grouping is critical for implementing the binning task successfully. Instead of quantile-based binning in our method, we also can manipulate equal-width binning. Here, we experiment with which method can be more beneficial for binning between the quantile and fixed size. We test the same candidates for the number of bins for equal-width binning, and we compare the test performance when the validation performance is the best with the quantile-based ones.

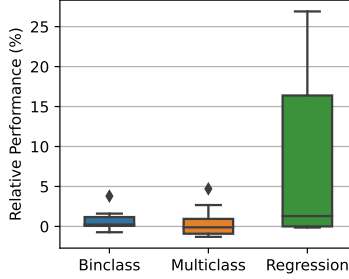

Figure 5: Relative performance when we change the binning method to the equal-width from the quantiles. When the values are positive, the quantile-based binning is better than the equal-width binning. When the values are negative, vice versa. In particular, for regression tasks, the quantile-based binning is much better than the equal-width binning.

The results are described in Figure 5. Among 25 datasets, equal-width binning showed better performance for three datasets (PH, HE, MNIST) to the extent of 0.6% at the maximum, and two binning methods showed comparable performance for two datasets (OT, AL). For the other 20 datasets, quantile-based binning showed better performance. In particular, for regression tasks, we found that the performance degrades 27% as the maximum when we change the binning method from quantile to fixed size. Finally, we conclude that quantile-based binning consistently results in good representations across various datasets.

### D.2 BIN INFORMATION IS NOT USABLE UNLESS IT IS PROVIDED AS A PRETEXT TASK

Table 9: Binning regression task performance on various SSL methods. We provide the relative error with the baseline of the BinRecon case. For all cases, the error is increased by at least 38%. As a result, the binning indices are achievable from the raw inputs but not usable in the resulting representations when we do not explicitly provide as the pretext targets.

| Masking | Masking value | Objective(s)        | Relative error increase (%) |
|---------|---------------|---------------------|-----------------------------|
| False   | -             | BinRecon            | (Baseline) 0                |
| False   | -             | ValueRecon          | 49.579                      |
| True    | Const.        | MaskXent            | 82.922                      |
| True    | Const.        | ValueRecon          | 38.444                      |
| True    | Const.        | MaskXent+ValueRecon | 68.344                      |
| True    | Random        | MaskXent            | 111.708                     |
| True    | Random        | ValueRecon          | 38.135                      |
| True    | Random        | MaskXent+ValueRecon | 60.016                      |
| Average |               |                     | 66.285                      |

## E ADDITIONAL RESULTS FOR REBUTTAL

Dear Reviewers,

We appreciate the significance of including the additional results. We aim to incorporate these experimental results in either the main text or the supplementary materials of the final manuscript. Due to page limitations, we might need to implement some modifications to include all the necessary content efficiently. Please refer to this section for an overview of the preliminary results.

Thank you for your attention to these details and for your valuable feedback.

### E.1 ADDITIONAL RESULTS WITH OTHER BACKBONE ENCODERS

Our method is model-agnostic, allowing flexibility in choosing backbone encoders. So, we have expanded our experiments to include the ResNet (Gorishniy et al., 2021) and T2G-Former (Yan et al., 2023) model, in addition to our initial tests with MLPs and FT-Transformers. We chose the ResNet due to its distinctly different architectural design compared to MLPs and FT-Transformers, and T2G-Former due to its superior performance.

We provide the partial results in Table 10 in the same format as Table 2 in the manuscript. All the cases are repeated ten times, and the average performance is provided. We found that the binning task is effective with ResNet and T2G-Former backbone as well. These results further validate the adaptability and effectiveness of our method across diverse DNN architectures.

Table 10: Comparison with supervised baselines. We compare the downstream task performance under several scenarios: (1) Baseline-1, where the encoder is randomly initialized; (2) Baseline-2, where the encoder is trained by optimizing the supervised loss; (3) Ours-1, where the encoder is trained based on the binning task only; and (4) Ours-2, where the encoder is fine-tuned after the pre-training on binning tasks. (Notation:  $\uparrow$  corresponds to accuracy,  $\downarrow$  corresponds to RMSE)

| Training method                 | CH $\uparrow$ | AD $\uparrow$ | PH $\uparrow$ | OS $\uparrow$ | CO $\uparrow$ | OT $\uparrow$ | GE $\uparrow$ | VO $\uparrow$ | HE $\uparrow$ | MNIST $\uparrow$ | CA $\downarrow$ | HO $\downarrow$ | FI $\downarrow$  | EL $\downarrow$ |
|---------------------------------|---------------|---------------|---------------|---------------|---------------|---------------|---------------|---------------|---------------|------------------|-----------------|-----------------|------------------|-----------------|
| <i>Encoder = MLP</i>            |               |               |               |               |               |               |               |               |               |                  |                 |                 |                  |                 |
| Baseline-1                      | 0.796         | 0.820         | 0.683         | 0.873         | 0.729         | 0.766         | 0.467         | 0.547         | 0.311         | 0.896            | 0.854           | 4.700           | 14241.610        | 0.400           |
| Baseline-2                      | 0.836         | 0.849         | 0.724         | 0.895         | 0.968         | 0.810         | 0.659         | 0.694         | 0.378         | 0.983            | 0.513           | 3.146           | 10086.080        | 0.354           |
| Ours-1                          | 0.823         | 0.846         | 0.736         | <b>0.896</b>  | 0.814         | 0.794         | 0.580         | 0.655         | 0.365         | 0.981            | 0.619           | 3.703           | 13038.762        | 0.368           |
| Ours-2                          | <b>0.841</b>  | <b>0.854</b>  | <b>0.738</b>  | 0.895         | <b>0.969</b>  | <b>0.814</b>  | <b>0.675</b>  | <b>0.724</b>  | <b>0.385</b>  | <b>0.986</b>     | <b>0.502</b>    | <b>3.026</b>    | <b>9963.609</b>  | <b>0.350</b>    |
| <i>Encoder = FT-Transformer</i> |               |               |               |               |               |               |               |               |               |                  |                 |                 |                  |                 |
| Baseline-1                      | 0.818         | 0.828         | 0.694         | 0.866         | 0.730         | 0.705         | 0.509         | 0.544         | 0.311         | 0.550            | 0.690           | 4.107           | 16128.694        | 0.394           |
| Baseline-2                      | 0.824         | 0.837         | 0.724         | 0.884         | 0.970         | <b>0.794</b>  | 0.664         | 0.704         | 0.338         | 0.966            | 0.487           | 3.319           | 10206.127        | 0.350           |
| Ours-1                          | <b>0.836</b>  | <b>0.853</b>  | 0.725         | <b>0.887</b>  | 0.762         | 0.780         | 0.554         | 0.614         | <b>0.364</b>  | 0.931            | 0.549           | 3.570           | 14557.626        | 0.371           |
| Ours-2                          | 0.834         | 0.839         | <b>0.734</b>  | 0.882         | <b>0.971</b>  | 0.793         | <b>0.698</b>  | <b>0.720</b>  | 0.342         | <b>0.978</b>     | <b>0.477</b>    | <b>3.173</b>    | <b>9936.115</b>  | <b>0.343</b>    |
| <i>Encoder = ResNet</i>         |               |               |               |               |               |               |               |               |               |                  |                 |                 |                  |                 |
| Baseline-1                      | 0.792         | 0.757         | 0.580         | 0.839         | 0.505         | 0.348         | 0.396         | 0.342         | 0.116         | 0.234            | 1.071           | 5.126           | 19854.911        | 0.473           |
| Baseline-2                      | 0.822         | 0.843         | 0.714         | 0.888         | 0.729         | 0.740         | 0.489         | 0.547         | 0.228         | 0.821            | 0.688           | 3.931           | 10591.441        | 0.409           |
| Ours-1                          | 0.791         | 0.806         | <b>0.716</b>  | 0.838         | 0.602         | 0.576         | 0.430         | 0.478         | 0.175         | 0.452            | 1.001           | 5.045           | 19276.360        | 0.455           |
| Ours-2                          | <b>0.838</b>  | <b>0.844</b>  | 0.715         | <b>0.890</b>  | <b>0.733</b>  | <b>0.743</b>  | <b>0.492</b>  | <b>0.552</b>  | <b>0.239</b>  | <b>0.824</b>     | <b>0.651</b>    | <b>3.929</b>    | <b>9843.289</b>  | <b>0.408</b>    |
| <i>Encoder = T2G-Former</i>     |               |               |               |               |               |               |               |               |               |                  |                 |                 |                  |                 |
| Baseline-1                      | 0.820         | 0.830         | 0.702         | 0.870         | 0.733         | 0.716         | 0.512         | 0.553         | 0.317         | 0.660            | 0.683           | 4.071           | 15991.264        | 0.393           |
| Baseline-2                      | 0.827         | 0.844         | 0.734         | 0.882         | 0.966         | 0.810         | 0.682         | 0.719         | 0.351         | 0.985            | 0.492           | 3.296           | 10551.509        | 0.348           |
| Ours-1                          | <b>0.834</b>  | <b>0.853</b>  | 0.730         | <b>0.891</b>  | 0.764         | 0.775         | 0.556         | 0.617         | <b>0.363</b>  | 0.951            | 0.570           | 3.540           | 15138.672        | 0.375           |
| Ours-2                          | 0.832         | 0.847         | <b>0.747</b>  | 0.883         | <b>0.968</b>  | <b>0.816</b>  | <b>0.713</b>  | <b>0.728</b>  | 0.353         | <b>0.985</b>     | <b>0.479</b>    | <b>3.257</b>    | <b>10497.660</b> | <b>0.342</b>    |

### E.2 COMPARISON WITH ADDITIONAL SUPERVISED METHODS PRE-TRAINED WITH OTHER PRETEXT TASKS

We will provide the additional results in Table 2 with the baselines, fine-tuned from the pre-trained weights on the other pretext tasks listed in Table 1. In this case, the hyperparameters are fixed, and only the pretraining objectives are different, so we can attribute the performance gain of our method to changing the pretext task as reconstructing the bin indices instead of the raw values. As shown in Table 11, the binning loss outperforms the others in most cases. Please note that even in cases where it did not yield the best performance, the binning loss demonstrated comparable results to the best-performing methods. Only the binning task consistently performs well among the four pretext tasks for all datasets.

Table 11: Comparison with additional supervised methods pre-trained with other pretext tasks. In this case, the models are pretrained with the pretraining loss denoted in the first column; then they are fine-tuned in a supervised fashion. All the architecture and optimization-related hyperparameters are fixed for each dataset.

| Pretraining loss                | CH $\uparrow$ | AD $\uparrow$ | PH $\uparrow$ | PO $\uparrow$ | CO $\uparrow$ | OT $\uparrow$ | GE $\uparrow$ | VO $\uparrow$ | HE $\uparrow$ | MNIST $\uparrow$ | CA $\downarrow$ | HO $\downarrow$ | FI $\downarrow$ | CPU $\downarrow$ |
|---------------------------------|---------------|---------------|---------------|---------------|---------------|---------------|---------------|---------------|---------------|------------------|-----------------|-----------------|-----------------|------------------|
| <i>Encoder = MLP</i>            |               |               |               |               |               |               |               |               |               |                  |                 |                 |                 |                  |
| MaskXent                        | 0.841         | 0.851         | 0.737         | 0.894         | 0.970         | 0.811         | 0.678         | 0.720         | 0.385         | 0.984            | <b>0.499</b>    | 3.086           | 10183.670       | 2.850            |
| ValueRecon                      | 0.837         | 0.849         | 0.719         | 0.890         | 0.969         | 0.810         | 0.669         | 0.707         | 0.381         | 0.984            | 0.511           | 3.119           | 10374.178       | 2.825            |
| MaskXent+ValueRecon             | 0.836         | 0.848         | 0.726         | 0.889         | 0.968         | 0.809         | 0.655         | 0.697         | 0.382         | 0.983            | 0.547           | 3.361           | 11842.398       | 2.871            |
| BinRecon                        | <b>0.842</b>  | <b>0.854</b>  | <b>0.738</b>  | <b>0.897</b>  | <b>0.970</b>  | <b>0.814</b>  | <b>0.680</b>  | <b>0.724</b>  | <b>0.386</b>  | <b>0.986</b>     | 0.500           | <b>3.026</b>    | <b>9963.609</b> | <b>2.791</b>     |
| <i>Encoder = FT-Transformer</i> |               |               |               |               |               |               |               |               |               |                  |                 |                 |                 |                  |
| MaskXent                        | 0.821         | 0.838         | 0.726         | 0.900         | 0.970         | <b>0.797</b>  | 0.682         | 0.690         | 0.335         | 0.973            | 0.479           | 3.196           | 10417.374       | 2.857            |
| ValueRecon                      | 0.821         | <b>0.840</b>  | 0.725         | 0.894         | 0.958         | 0.781         | 0.646         | 0.684         | 0.331         | <b>0.979</b>     | 0.483           | 3.301           | 10527.885       | 2.769            |
| MaskXent+ValueRecon             | 0.824         | 0.839         | 0.735         | 0.899         | 0.960         | 0.785         | 0.658         | 0.689         | 0.331         | <b>0.979</b>     | 0.486           | 3.257           | 10708.780       | 2.762            |
| BinRecon                        | <b>0.835</b>  | 0.839         | <b>0.736</b>  | <b>0.902</b>  | <b>0.971</b>  | 0.794         | <b>0.698</b>  | <b>0.720</b>  | <b>0.342</b>  | <b>0.979</b>     | <b>0.477</b>    | <b>3.173</b>    | <b>9936.115</b> | <b>2.753</b>     |

### E.3 VISUALIZATION ANALYSIS

In the manuscript, we provide some discussion based on the experimental results related to the benefits of binning as a pretext task in Section 6. In summary, we found (1) grouping similar values is the most critical factor for the successful implementation of binning (Section 6.1), and (2) bin information is not usable unless it is provided as a pretext task (Section 6.3). To enhance the interpretability of our analysis, we provide the visualization results.

To show that the binning loss can effectively encourage grouping factor, i.e., to make the similar values (i.e., in the same bins) closer to each other and separated from other values, we visualize the representation vectors after SSL with the different pretext task of ValueRecon (Figure 6 Left) and BinRecon (Figure 6 Right) in the case of HO dataset. Because the representation vectors are high-dimensional, we implement PCA for better interpretability. In Figure 6, we denote the samples in the smallest bin as gray and the samples in the largest bin as orange. As a result, we found that the representation vectors are grouped only when we utilize the BinRecon loss. (The discussion will be added in Section 6 with a more detailed explanation.)

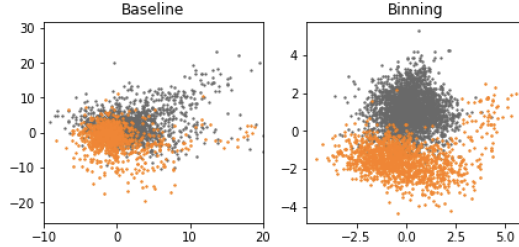

Figure 6: Visualization analysis
